# Supplementary material
Source: PubMed Central journal article supplement (PMC6103723)
Supplement: krnb-15-4-5-1379635-s001.pdf [file krnb-15-4-5-1379635-s001.pdf]

| Chemical                                         | Chemical | Chemical                             | Chemical   | Chemical              |
|--------------------------------------------------|----------|--------------------------------------|------------|-----------------------|
| Neomycin                                         | FRS1     | YAR1 --> STP1--> LEU3--> GCN4        | GCN4       | yeast genome database |
| Cycloheximide                                    | FRS1     | BMH1--> XBP1--> SFP1                 | TORC1      | yeast genome database |
| Paromomycin sulfate                              | FRS1     | YAR1 --> GCN5 --> YAP1--> SFP1       | TORC1      | yeast genome database |
| Hygromycin B                                     | FRS1     | PGM2-->CYC8-->XBP1-->SFP1            | TORC1      | yeast genome database |
| Hydroxyurea                                      | frs1-1   | ASC1--> SFP1                         | TORC1      | yeast genome database |
| Cobalt (II) chloride                             | frs1-1   | POP2--> YAP6--> RAP1--> GLN3--> GCN4 | GCN4       | yeast genome database |
| Cadmium Chloride                                 | frs1-1   | PLC1--> YAP5--> UGA3--> SFP1/GCN4    | TORC1/GCN4 | yeast genome database |
| FCCP- Carbonyl cyanide-4-(trifluoromethoxy)pheny | frs1-1   | YGL39W--> MSN2-->MET4-->STP1-->LEU3  | GCN4       | yeast genome database |
| Thallium (I) acetate                             | frs1-1   | IAH1--> SFP1                         | TORC1      | yeast genome database |
| Sodium Arsonate                                  | frs1-1   | AARI--> SFP1                         | TORC1      | yeast genome database |
| L-Tyrosine                                       | FRS1     | TYS1--> SFP1                         | TORC1      | yeast genome database |
| Diamide                                          | FRS1     | YMR315W--> STB1--> SFP1              | TORC1      | yeast genome database |
| Paromomycin                                      | frs1-1   | MTO1--> SFP1                         | TORC1      | yeast genome database |
| Formamide                                        | frs1-1   | IPL1--> XIR1 --> TIR4--> SFP1        | TORC1      | yeast genome database |
| Lysine                                           | frs1-1   | MSK1--> STB1--> MED4--> UGA3--> SFP1 | TORC1      | yeast genome database |
| Histidine                                        | frs1-1   | HIS1--> SIN4--> UGA3--> SFP1         | TORC1      | yeast genome database |
| Caffeine                                         | frs1-1   | YXL222C--> XBP1--> SFP1              | TORC1      | yeast genome database |
| Cetylphridinium Chloride                         | frs1-1   | NPC2--> GCR1--> GCN5--> YAP1--> SFP1 | GCN4       | yeast genome database |
